# Supplementary material
Source: Springer Nature journal article supplement (https://www.springermedizin.de/resource/supplementary/12865_2012_523_MOESM3_ESM.pdf/9428128)
Supplement: MOESM3 [file 9428128]

**Table S2.** Gene expression levels in T cell recall to ANDV nucleocapsid antigen. Cells in pink are 1.5-fold or more increased. No gene was decreased 50% or more. The numerals in red font indicate the number of genes in that category that were elevated for each deer mouse.

| Gene                 | DM2      | DM3       | DM4       | DM6       |
|----------------------|----------|-----------|-----------|-----------|
| <b>Th1 expressed</b> | <b>2</b> | <b>7</b>  | <b>3</b>  | <b>7</b>  |
| IFNg                 | 0.77     | 3.13      | 0.98      | 2.88      |
| TNF                  | 1.08     | 1.98      | 0.94      | 1.74      |
| LTA                  | 0.84     | 0.81      | 0.77      | 0.84      |
| Il12b                | 0.98     | 1.00      | 0.82      | 0.94      |
| Il12rb2              | 0.76     | 3.02      | 0.80      | 0.80      |
| Il18r1               | 0.87     | 1.23      | 1.13      | 1.20      |
| Il18rap              | 0.74     | 1.14      | 0.99      | 1.98      |
| Fasl                 | 1.02     | 1.08      | 0.88      | 1.21      |
| Havcr2               | 0.79     | 1.14      | 1.00      | 1.14      |
| Irf1                 | 1.11     | 3.22      | 3.57      | 2.42      |
| Runx3                | 1.61     | 1.71      | 1.87      | 1.97      |
| Socs1                | 1.23     | 0.98      | 1.27      | 1.61      |
| Socs5                | 1.35     | 0.81      | 0.90      | 0.89      |
| Stat1                | 2.96     | 5.01      | 5.19      | 3.57      |
| Stat4                | 0.66     | 0.86      | 1.14      | 1.05      |
| Tbx21                | 0.67     | 1.00      | 1.25      | 1.47      |
| Traf6                | 1.00     | 2.51      | 1.00      | 1.48      |
| <b>Th2 expressed</b> | <b>8</b> | <b>17</b> | <b>12</b> | <b>14</b> |
| IL4                  | 2.61     | 6.75      | 3.88      | 7.19      |
| Il4ra                | 5.26     | 8.49      | 2.44      | 2.40      |
| Il13                 | 0.77     | 2.44      | 2.45      | 2.69      |
| Il13ra1              | 0.86     | 2.45      | 1.02      | 1.38      |
| IL5                  | 0.81     | 0.83      | 0.68      | 0.67      |
| Il6                  | 1.04     | 2.54      | 1.31      | 1.33      |
| Ccl5                 | 1.15     | 3.93      | 1.07      | 1.16      |
| Ccl7                 | 0.77     | 1.18      | 0.76      | 0.86      |
| Ccl11                | 1.08     | 0.80      | 0.92      | 0.90      |
| Il1rl1               | 0.81     | 0.81      | 0.79      | 0.98      |
| Ccr3                 | 0.71     | 1.02      | 0.83      | 0.82      |
| Ccr4                 | 0.94     | 0.89      | 1.22      | 1.60      |
| Asb2                 | 2.51     | 5.72      | 1.56      | 1.34      |
| Cebpb                | 0.88     | 2.56      | 1.09      | 2.44      |
| Gata3                | 0.77     | 0.96      | 0.91      | 0.98      |
| Gata4                | 0.89     | 18.83     | 2.15      | 3.57      |
| Gfi1                 | 0.77     | 3.28      | 1.11      | 0.91      |
| Gpr44                | 0.81     | 2.54      | 0.98      | 1.87      |
| Icos                 | 0.90     | 7.70      | 3.99      | 4.10      |
| Irf4                 | 3.00     | 3.08      | 4.04      | 4.42      |
| Irf8                 | 2.34     | 10.74     | 2.92      | 3.11      |
| Jak1                 | 1.56     | 2.39      | 1.91      | 1.86      |
| Nfatc1               | 1.19     | 0.98      | 0.99      | 0.84      |
| Nfatc2               | 0.97     | 1.04      | 0.98      | 0.73      |

| Gene                    | DM2      | DM3      | DM4      | DM6       |
|-------------------------|----------|----------|----------|-----------|
| Nfatc2ip                | 2.45     | 1.85     | 5.05     | 2.29      |
| Pparg                   | 0.83     | 0.67     | 0.70     | 0.69      |
| Stat6                   | 2.35     | 2.58     | 3.69     | 1.99      |
| Tmed1                   | 0.63     | 0.83     | 0.96     | 1.51      |
| <b>Treg expressed</b>   | <b>2</b> | <b>2</b> | <b>1</b> | <b>3</b>  |
| TGFb                    | 3.62     | 8.43     | 0.93     | 6.17      |
| IL10                    | 0.92     | 0.71     | 0.87     | 0.84      |
| Ccr6                    | 0.82     | 1.19     | 0.80     | 0.77      |
| Fosl1                   | 0.94     | 0.92     | 1.05     | 1.17      |
| Ikzf2                   | 0.83     | 0.96     | 0.98     | 2.23      |
| Nr4a1                   | 0.92     | 1.05     | 1.26     | 1.27      |
| Nr4a3                   | 0.94     | 1.34     | 0.93     | 0.91      |
| Pou2f2                  | 3.28     | 4.16     | 3.06     | 4.36      |
| Tgif1                   | 0.79     | 1.00     | 0.71     | 1.18      |
| Foxp3                   | 0.64     | 0.82     | 1.02     | 1.08      |
| <b>Th17 expressed</b>   | <b>0</b> | <b>1</b> | <b>0</b> | <b>2</b>  |
| Il17a                   | 0.85     | 1.09     | 0.87     | 1.02      |
| Il17re                  | 0.83     | 2.01     | 1.07     | 2.02      |
| IL21                    | 0.89     | 0.91     | 1.22     | 1.28      |
| Il1r1                   | 0.93     | 0.77     | 0.85     | 0.86      |
| Rora                    | 0.71     | 1.04     | 1.19     | 1.69      |
| <b>Others expressed</b> | <b>2</b> | <b>4</b> | <b>4</b> | <b>10</b> |
| Myb                     | 0.93     | 0.76     | 1.06     | 1.07      |
| Chd7                    | 1.05     | 0.94     | 1.45     | 1.65      |
| Hoxa10                  | 0.67     | 1.11     | 1.06     | 0.96      |
| Hoxa3                   | 0.81     | 1.06     | 0.71     | 0.76      |
| Igsf6                   | 2.59     | 1.06     | 0.69     | 0.77      |
| IL23                    | 0.70     | 0.95     | 0.96     | 1.05      |
| Il1r2                   | 1.00     | 1.00     | 1.13     | 1.26      |
| Il2ra                   | 0.95     | 2.92     | 3.08     | 2.67      |
| Cacna1f                 | 0.86     | 1.05     | 1.10     | 0.78      |
| Lrrc32                  | 0.74     | 0.96     | 0.92     | 1.17      |
| Maf                     | 1.02     | 0.84     | 0.82     | 0.69      |
| Perp                    | 0.82     | 0.84     | 0.90     | 1.24      |
| Pkd2                    | 0.47     | 1.07     | 0.82     | 1.46      |
| Runx1                   | 1.29     | 0.98     | 1.31     | 1.75      |
| Tnfrsf9                 | 1.15     | 0.59     | 0.64     | 0.59      |
| Trp53inp1               | 2.56     | 2.14     | 3.45     | 1.48      |
| Uts2                    | 0.93     | 0.74     | 0.67     | 0.56      |
| Zbtb7b                  | 0.94     | 0.76     | 0.94     | 1.47      |
| Zeb1                    | 0.91     | 0.89     | 0.83     | 0.85      |
| Ddx58                   | 0.78     | 1.12     | 0.98     | 1.52      |
| Ifna2                   | 0.98     | 0.80     | 0.64     | 0.67      |
| Ifnb1                   | 0.65     | 0.83     | 0.71     | 1.11      |
| Il12a                   | 0.73     | 0.96     | 0.78     | 1.63      |
| Irf3                    | 0.64     | 0.82     | 0.94     | 1.70      |
| Mapk1                   | 0.94     | 1.00     | 1.14     | 1.77      |

| Gene         | DM2  | DM3  | DM4  | DM6  |
|--------------|------|------|------|------|
| Mx1          | 0.89 | 0.86 | 0.86 | 1.71 |
| Oas2         | 0.82 | 0.77 | 0.86 | 0.83 |
| Ccl2         | 0.77 | 0.83 | 0.65 | 0.83 |
| Ccl3         | 1.00 | 3.35 | 2.86 | 3.75 |
| Ccl4         | 0.76 | 0.96 | 0.59 | 0.90 |
| Cxcl2        | 0.96 | 4.98 | 5.76 | 5.33 |
| TCRb         | 0.84 | 0.98 | 0.84 | 0.83 |
| CD4          | 0.77 | 1.02 | 0.91 | 0.99 |
| CD8a         | 0.84 | 0.71 | 0.80 | 1.30 |
| <b>GAPDH</b> |      |      |      |      |
| Replicate 1  | 0.90 | 1.18 | 1.11 | 1.08 |
| Replicate 2  | 1.11 | 0.85 | 0.90 | 0.92 |
